# Supplementary material for: Transcription-dependent targeting of Hda1C to hyperactive genes mediates H4-specific deacetylation in yeast
Source: PubMed Central journal article supplement (PMC6753149; doi:10.1038/s41467-019-12077-w), 2019-09-19
Supplement: 41467_2019_12077_MOESM1_ESM.pdf [file 41467_2019_12077_MOESM1_ESM.pdf]

# Transcription-dependent targeting of Hda1C to hyperactive genes mediates H4-specific deacetylation in yeast

Ha et al.

# Supplementary Figure 1

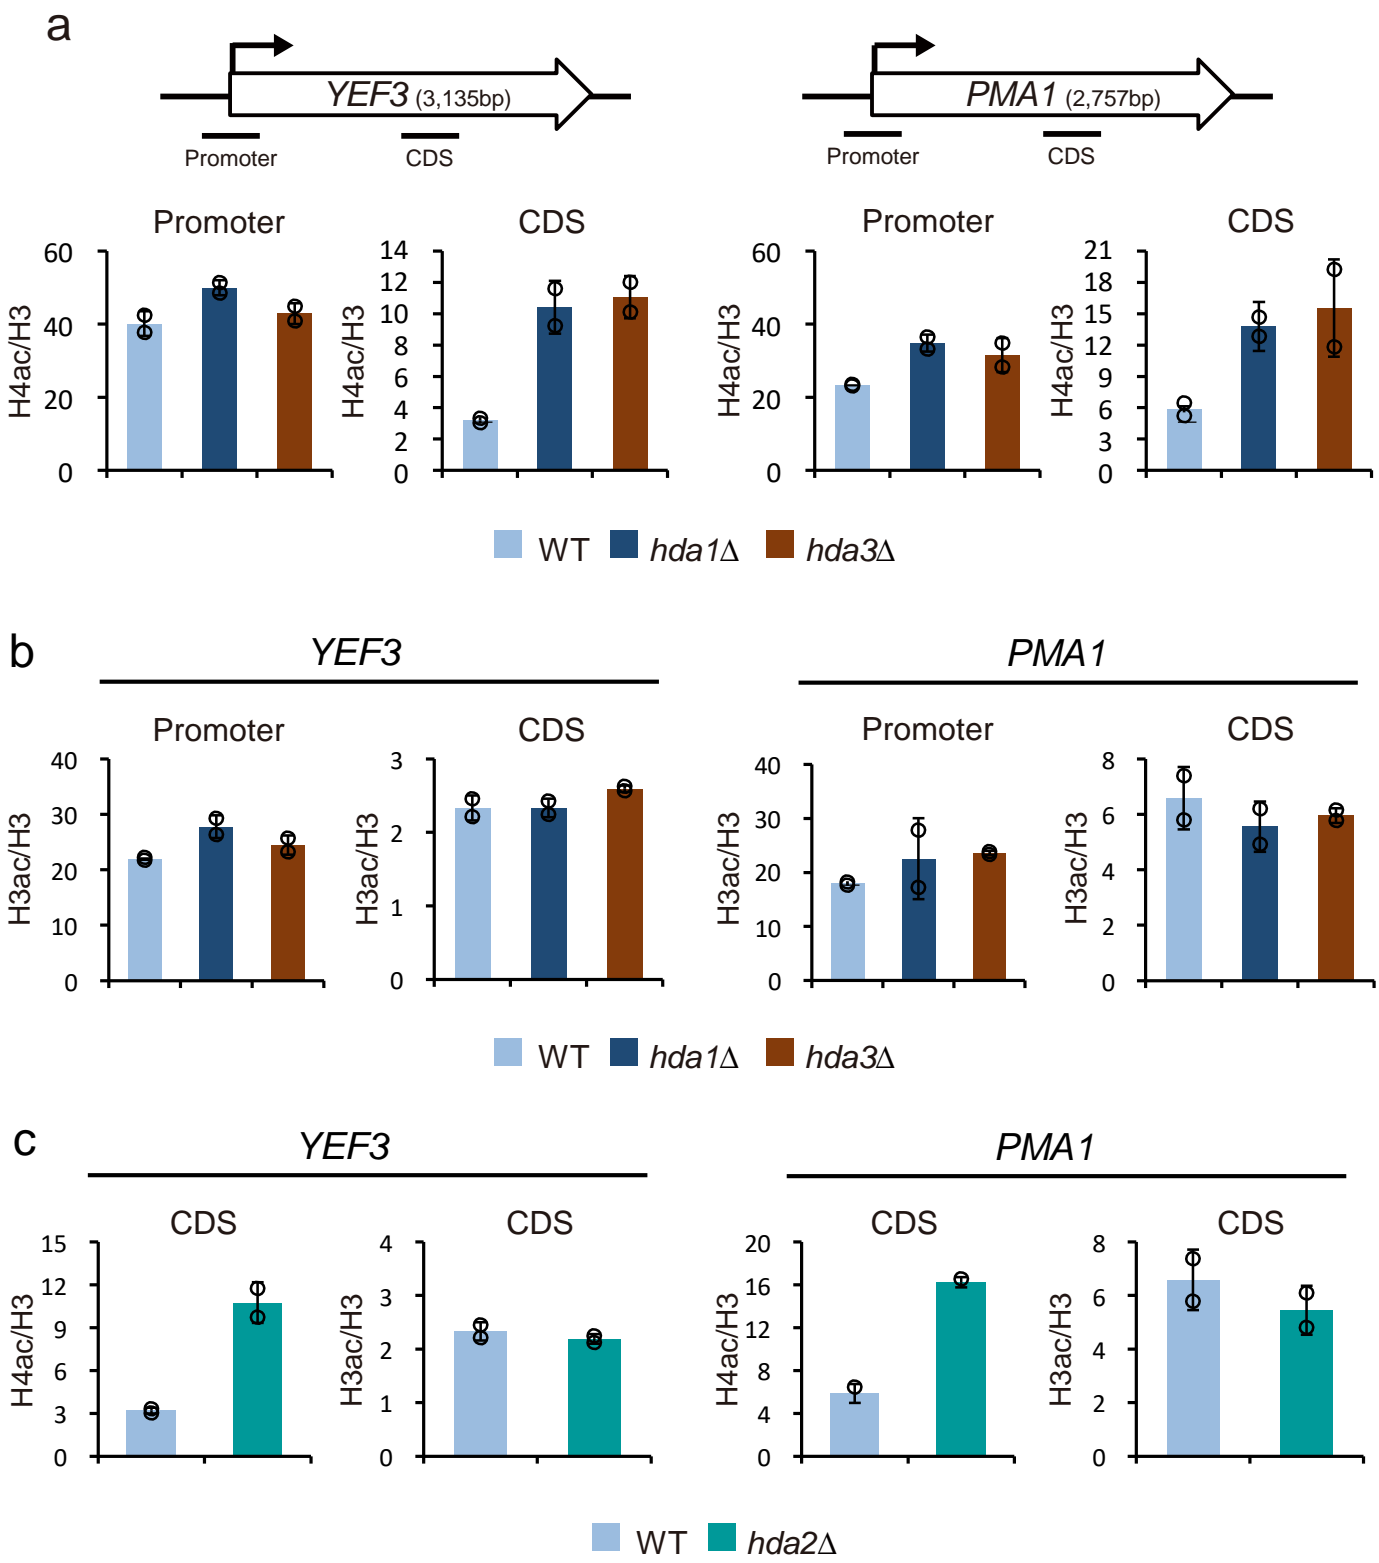

**Supplementary Figure 1. Hda1C deacetylates H4 but not H3 at highly active genes.**

(a) Loss of Hda1 and Hda3 results in increase of H4 acetylation at active coding regions. Crosslinked chromatin from the indicated strains grown in YPD was precipitated with anti-H3 or anti-acetyl H4 as indicated. ChIP assay was done as in **Fig. 1b**. (b) Hda1C is not required for H3 deacetylation at active genes. ChIP assay was done as in **a**. (c) Histone acetylation pattern within coding regions of *YEF3* and *PMA1* in *hda2Δ*. ChIP assay was done as in **a**. Source data are provided as a Source Data file.

# Supplementary Figure 2

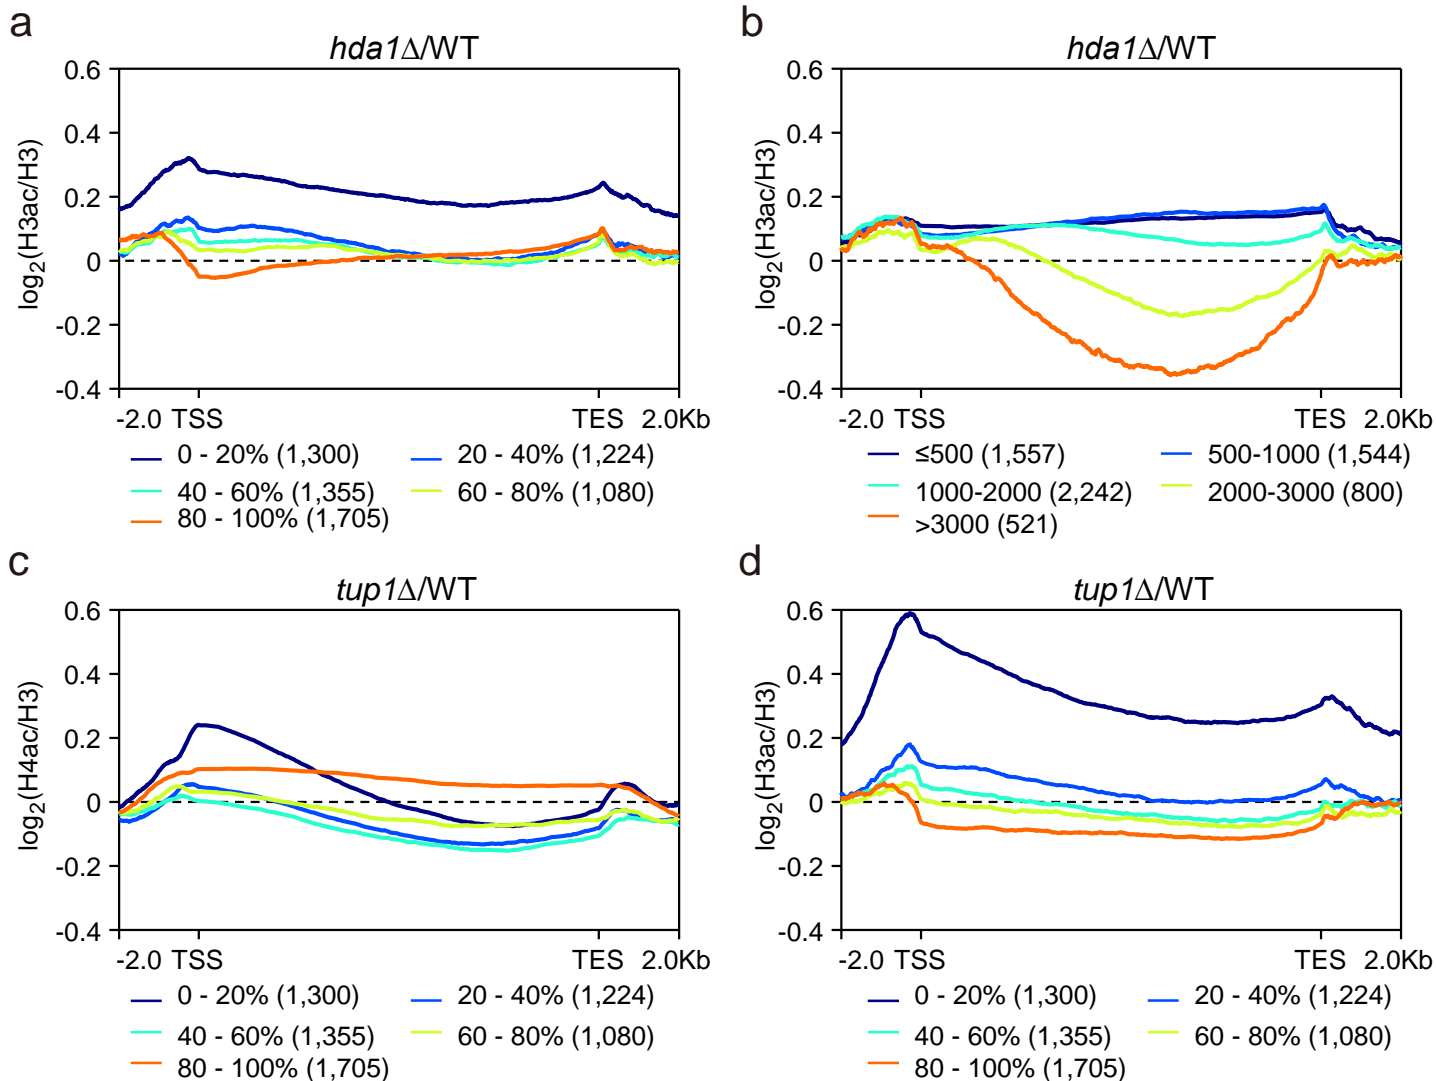

**Supplementary Figure 2. Effect of *hda1Δ* or *tup1Δ* on global histone acetylation pattern.**

(a-b) Inactive genes show an increase in H3 acetylation upon deletion of *HDA1*. Average plot of histone acetylation patterns based on RNA Pol II occupancy (Rpd3). Whereas the 0 - 20% group includes genes showing the lowest Rpb3 occupancy, the 80 - 100% group includes genes having the highest Rpb3 crosslinking (a). Average plot of H3 acetylation patterns based on gene length (b). (c-d) Tup1 is required for deacetylation of both histone H3 and H4. Average plot of H4 acetylation (c) or H3 acetylation (d) patterns based on RNA Pol II occupancy (Rpd3).

# Supplementary Figure 3

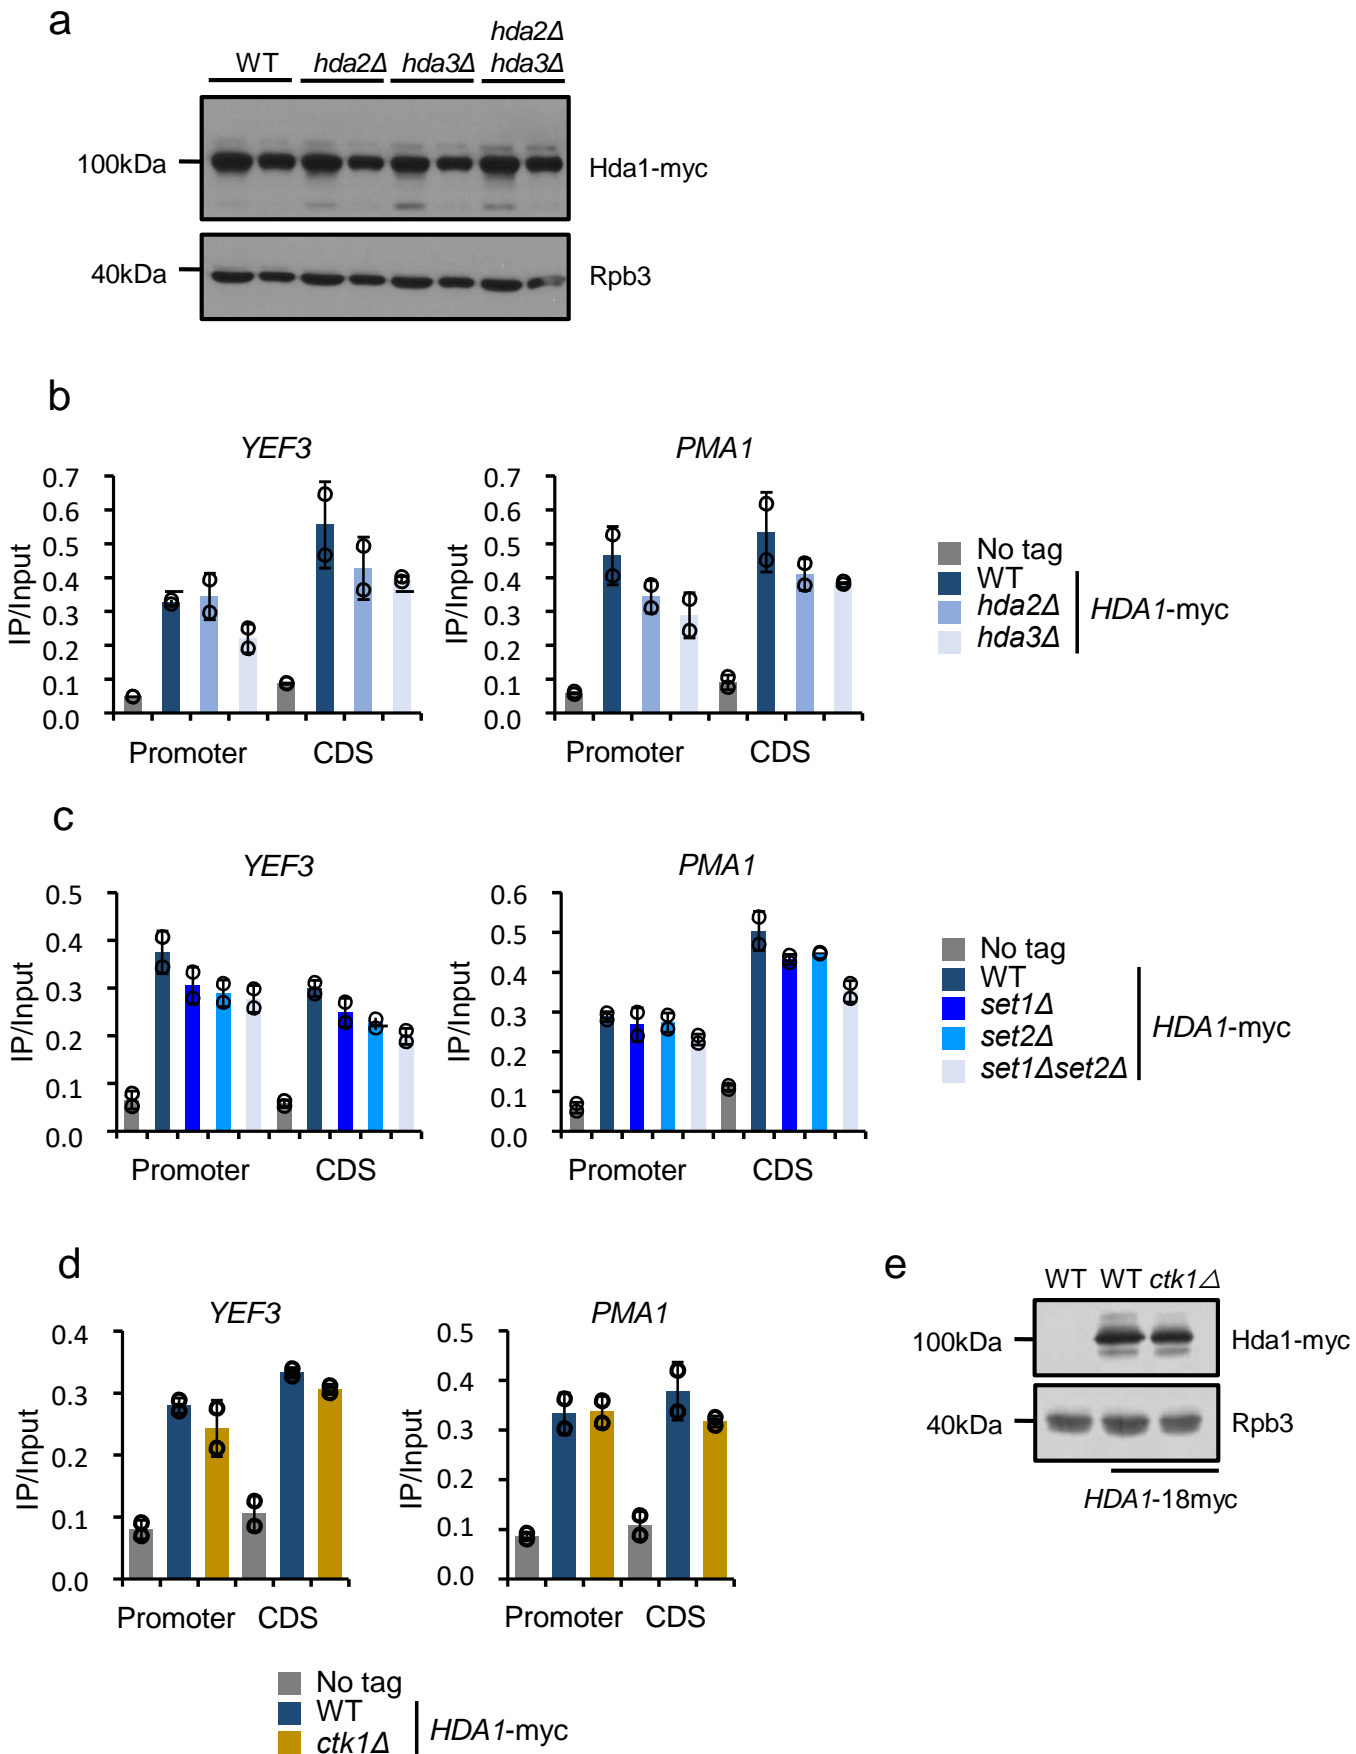

## Supplementary Figure 3. Factors required for Hda1C recruitment.

(a) Loss of Hda2 or Hda3 does not affect Hda1 protein levels. Total proteins extracted from the indicated strains grown in YPD were separated by SDS-PAGE and probed with antibodies indicated on the right. Rpb3 was used as a loading control. (b) Hda2 and Hda3 partially affect Hda1 recruitment. ChIP assays using the indicated strains were performed as in **Fig. 3a**. (c) Loss of both Set1 and Set2 partially reduces Hda1 crosslinking. ChIP assay using the indicated strains was performed as in **Fig. 3a**. (d) Ctk1 is not required for Hda1C crosslinking. ChIP assay using the indicated strains was performed as in **Fig. 3a**. Source data are provided as a Source Data file. (e) Hda1 protein levels in wild-type and *ctk1Δ* cells. Western blot analysis was done as in **a**.

# Supplementary Figure 4

a

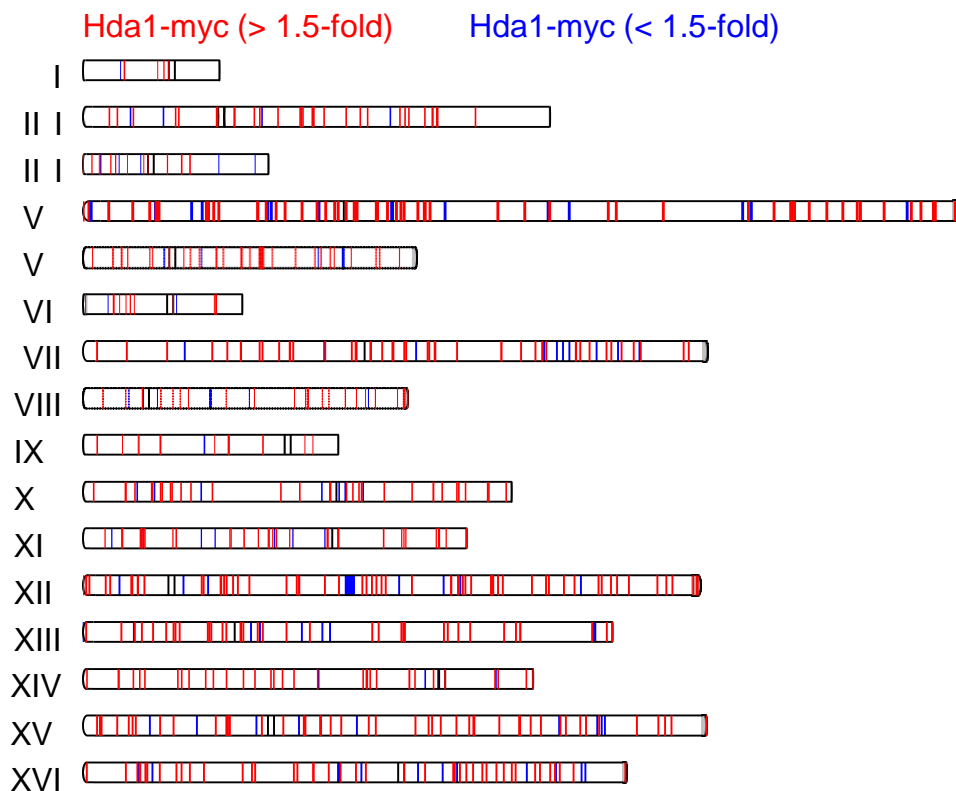

b

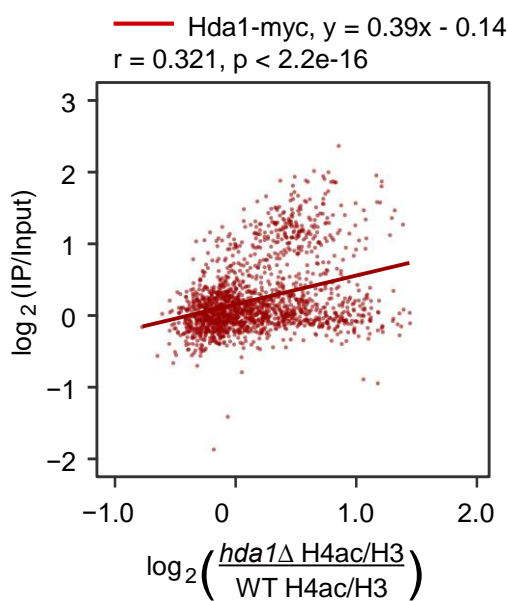

c

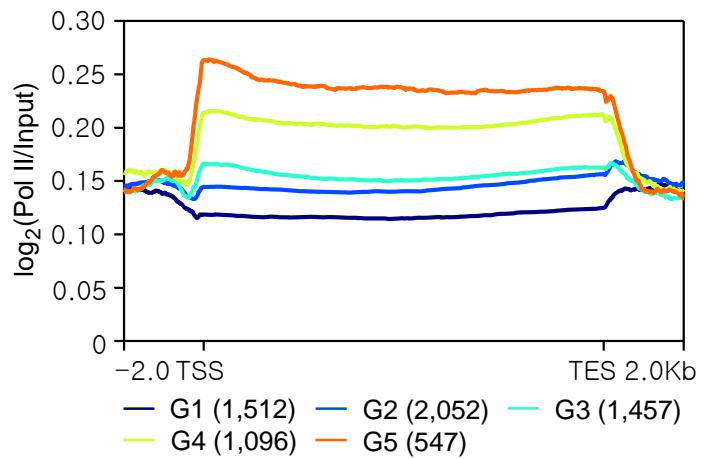

d

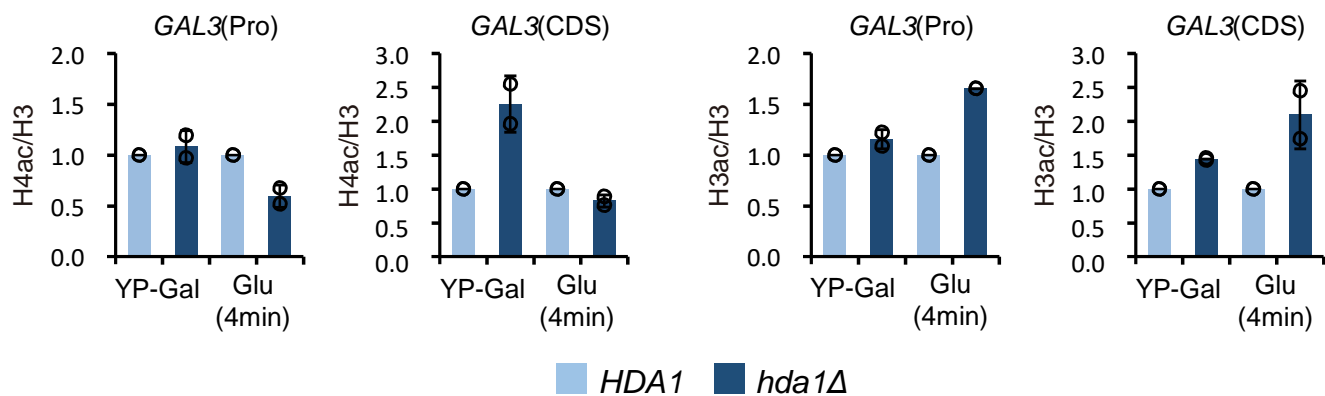

#### Supplementary Figure 4. Hda1C binds to highly transcribed genes to deacetylate histone H4.

(a) 571 Hda1C binding sites across yeast genomes. >1.5 fold (red) and <1.5 (blue). (b) The scatterplot shows a correlation between Hda1 binding and increase in H4 acetylation upon *HDA1* deletion at highly transcribed genes (top 25%) from **Fig. 4b**. Pearson's correlation coefficients are indicated. (c) Hda1C deacetylates histone H4 at highly active genes. Group 4 and 5 from **Fig. 2c** and **2d** showing a dramatic increase in H4 acetylation upon *HDA1* deletion exhibit relatively high levels of RNA Pol II. The y-axis indicates the normalized CHIP-seq reads and the x-axis indicates distance from the transcription start site (TSS) and transcription end site (TES). The number of genes is indicated in the parenthesis. (d) Crosslinked chromatin from the indicated strains, grown as described in **Fig. 4g**, was precipitated with an anti-H3, anti-acetyl H3, or anti-acetyl H4 antibody as indicated. PCR analysis of the precipitated DNA was performed as in **Fig. 1a**. Acetylation levels from wild type (*HDA1*) were set to 1. Source data are provided as a Source Data file.

# Supplementary Figure 5

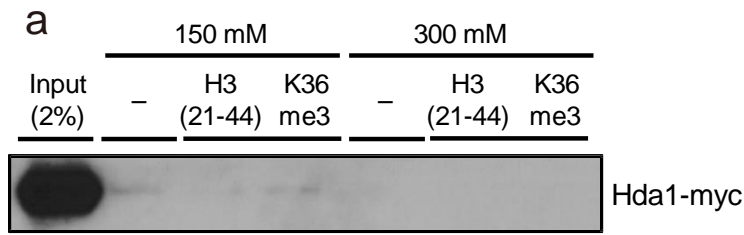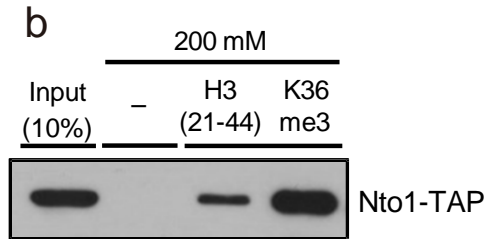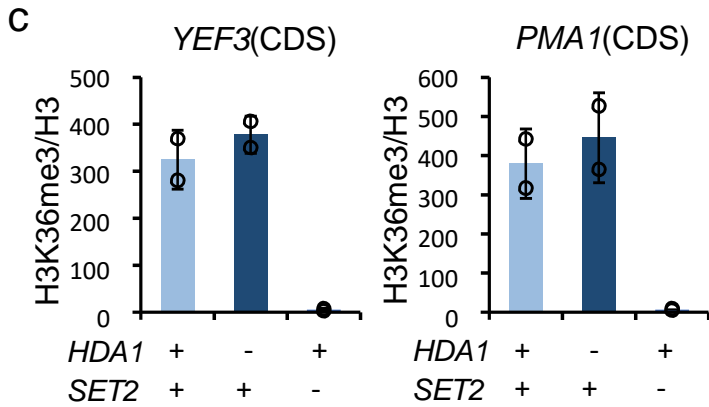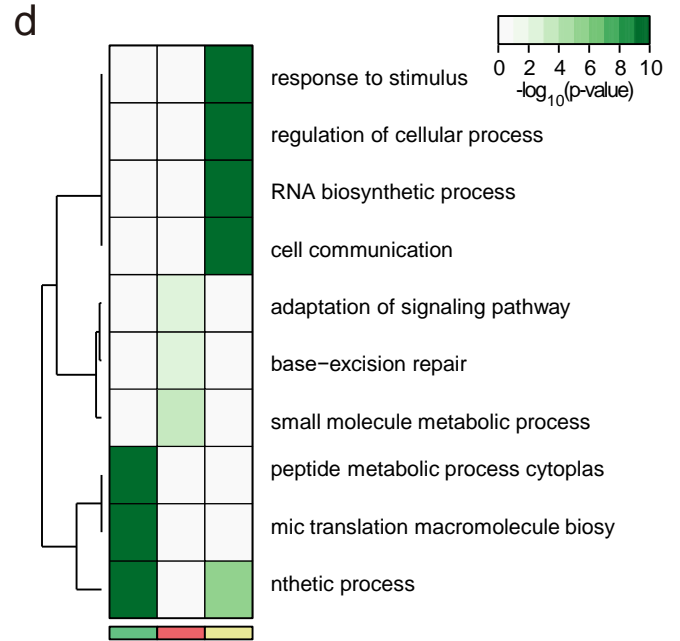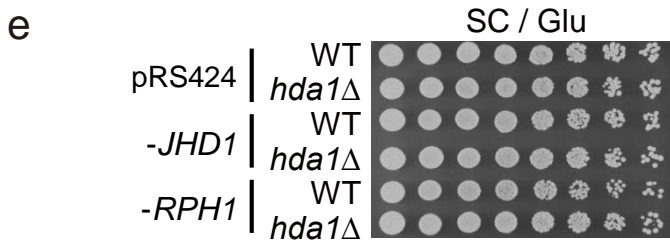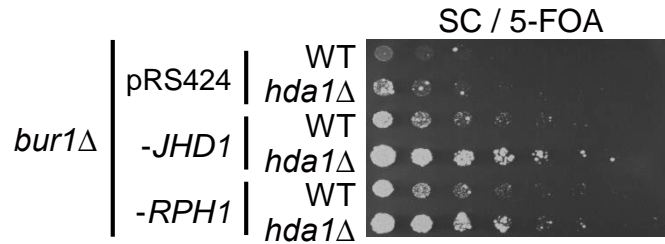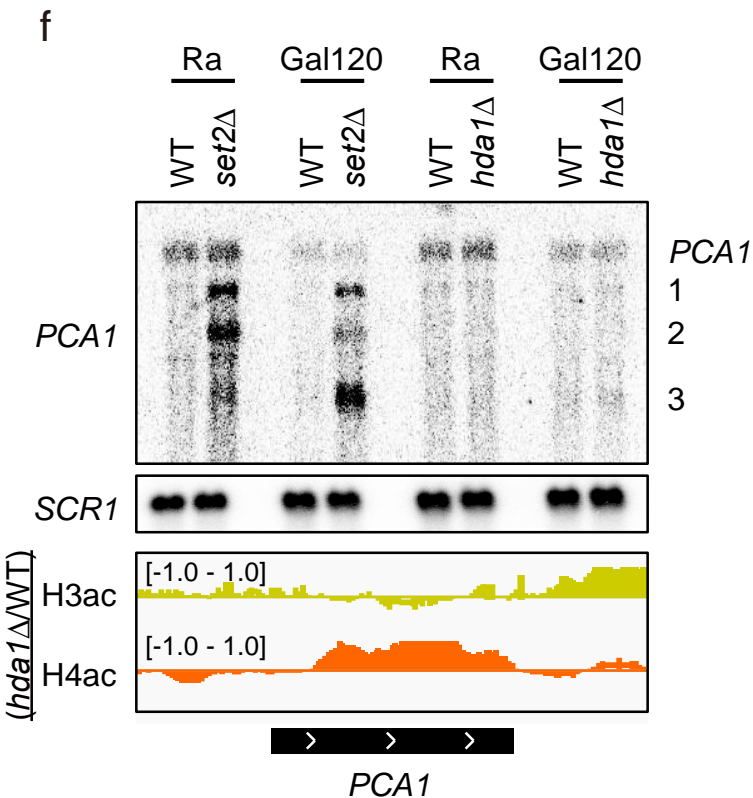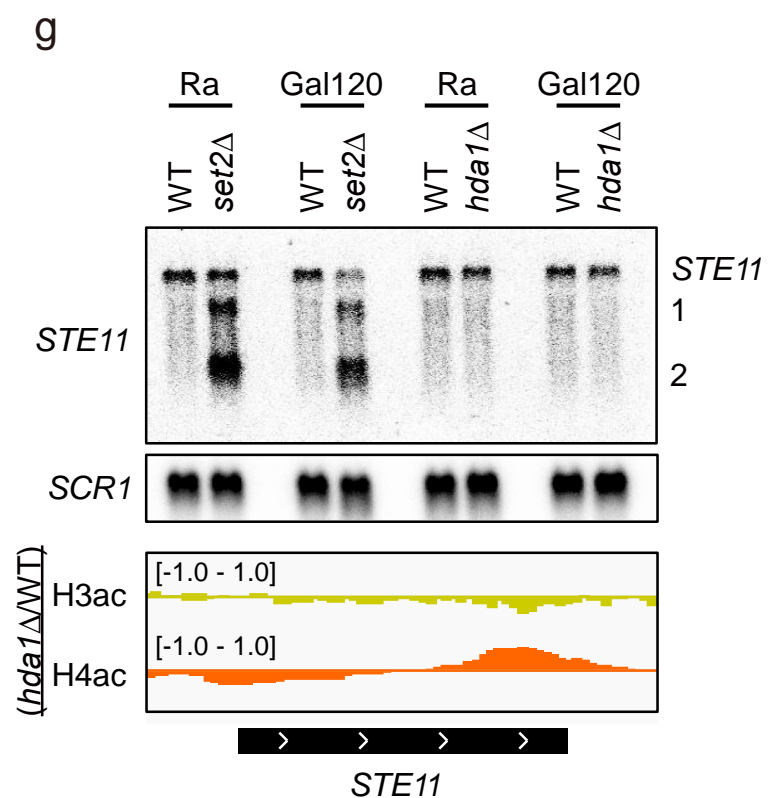

# Supplementary Figure 5

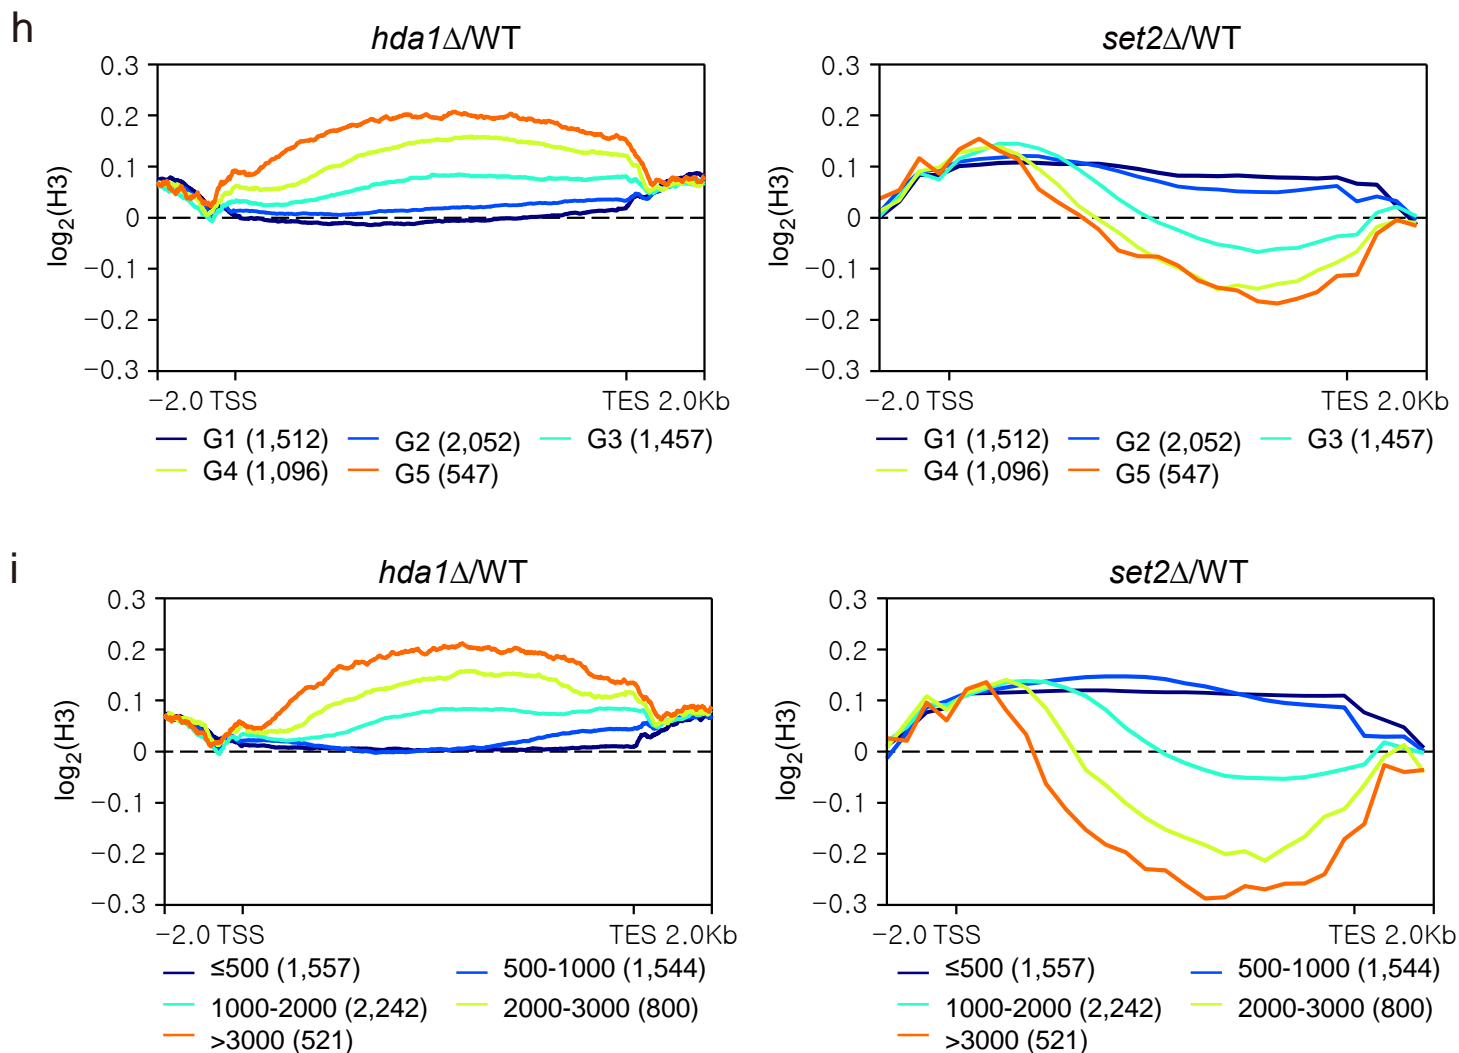

## Supplementary Figure 5. Effects of H4-specific deacetylation by Hda1C.

(a) Hda1C does not bind to methylated K36 of histone H3. Histone peptide binding assay was performed with whole-cell extracts expressing Hda1-myc and 1  $\mu$ g of the indicated histone peptides immobilized on magnetic beads. Precipitated Hda1 protein was analyzed by western blot analysis with anti-myc antibody. (b) Nto1, a subunit of NuA3 HAT strongly binds to methylated K36 of histone H3. Histone peptide binding assay was performed with whole-cell extracts expressing Nto1-TAP and 1  $\mu$ g of the indicated histone peptides immobilized on magnetic beads. Precipitated Nto1 protein was analyzed by western blot analysis with anti-TAP antibody. (c) Loss of Hda1 does not affect H3K36me3 patterns. Crosslinked chromatin from the indicated strains grown in YPD was precipitated with anti-H3 or anti-H3K36me3 antibody. ChIP assay was done as in **Fig. 1b**. The *set2*Δ mutant was used as a control. Source data are provided as a Source Data file. (d) Hda1C and Set2 have distinct biological functions. Gene Ontology terms enriched in the three groups described in **Fig. 5d**. Significance was determined using hypergeometric tests. (e) Synergistic effects of overexpression of histone demethylases for H3K36 and loss of Hda1 on *bur1*Δ suppression. Jhd1 or Rph1 was overexpressed in the indicated strains. The resulting cells were spotted in 3-fold dilutions onto a SC/Glu plate (shown after 2 days) or a SC/Glu +5-FOA plate (shown after 8 days). (f-g) Hda1C does not affect cryptic transcription. The indicated strains were grown in SC-raffinose (Ra) and shifted to SC-galactose for 120min (Gal 120). *SCR1* is used as a loading control. (f) Northern blot analysis of *PCA1* cryptic transcripts (upper panel) and the log<sub>2</sub> fold changes in H3 or H4 acetylation in *hda1*Δ cells versus wild-type cells (bottom panel). (g) Northern blot analysis (upper panel) and the log<sub>2</sub> fold changes in H3 or H4 acetylation in *hda1*Δ cells versus wild-type cells (bottom panel). (h) Deacetylation of H4 by Hda1C may reduce histone occupancy. Average H3 occupancies in *hda1*Δ and *set2*Δ cells, categorized into the five groups shown in **Fig. 2c**. Whereas *hda1*Δ shows a slightly increased H3 levels within coding regions, the opposite pattern is seen in *set2*Δ. The number of genes is indicated in the parenthesis. (i) Longer genes show higher nucleosome occupancy than shorter genes upon deletion of *HDA1*. The plots show average H3 occupancies grouped by gene length. The number of genes is indicated in the parenthesis.



# Supplementary Figure 6

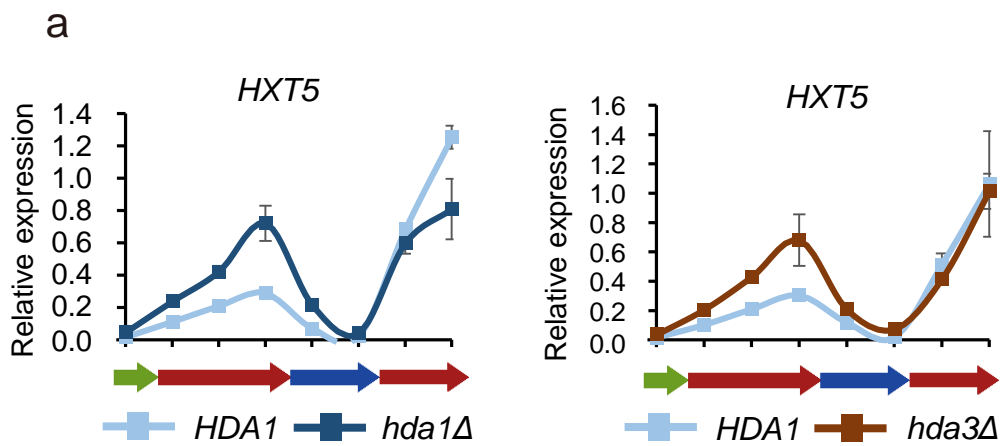

## Supplementary Figure 6. Hda1C negatively regulates gene induction via H3 deacetylation.

(a) Expression patterns of *HXT5* in *hda1Δ* or *hda3Δ* during carbon source shifts. The time course experiments were done as **Fig. 6a**. The mRNA levels were determined by RT-PCR with two independent RNA samples. Error bars show the standard deviation (S.D.) calculated from two biological replicates, each with three technical replicates. Source data are provided as a Source Data file.

Supplementary Figure 7

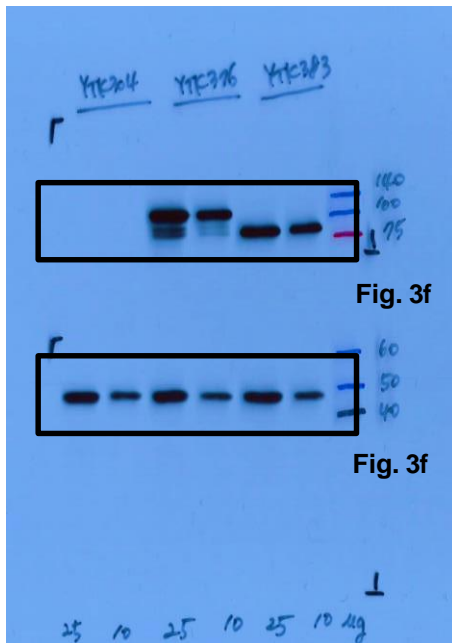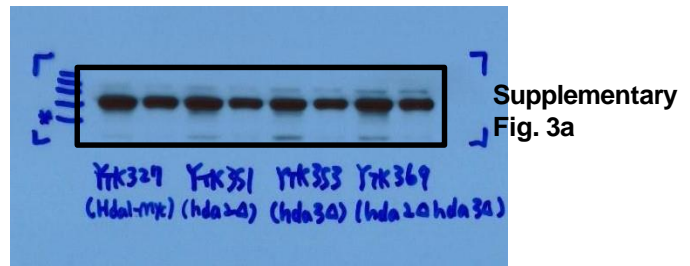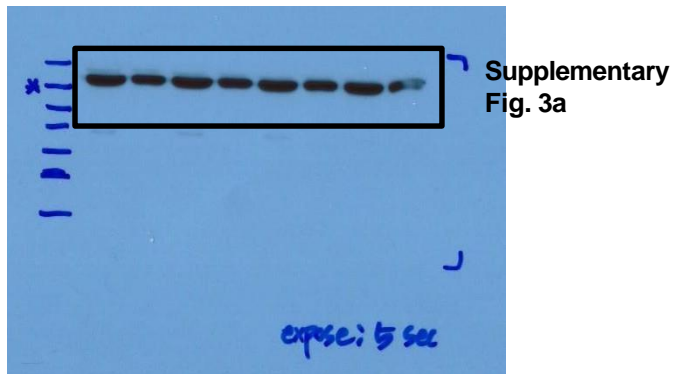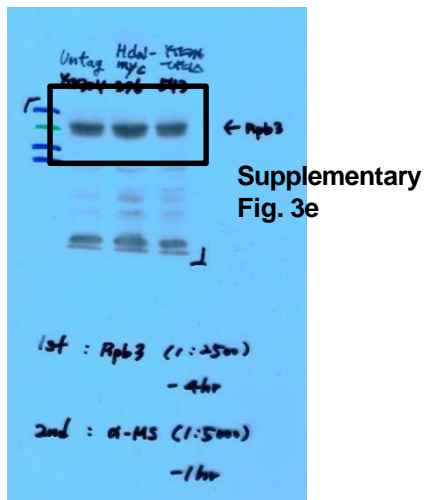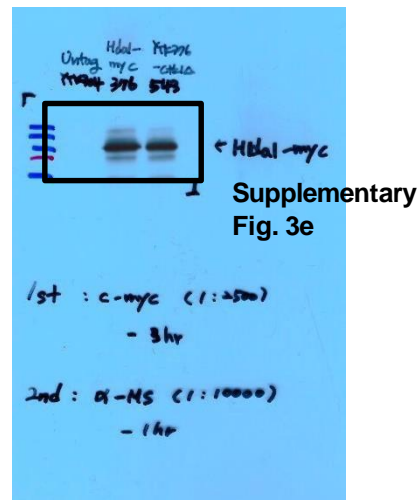

Supplementary Figure 7. Original western blots images for Fig. 3 and Supplementary Fig. 3. The uncropped scans of western blot exposed to x-ray films.

Supplementary Figure 8

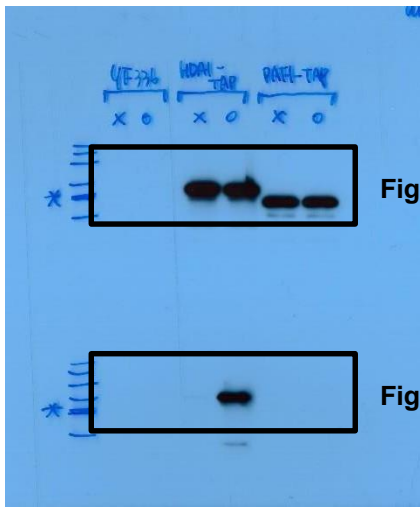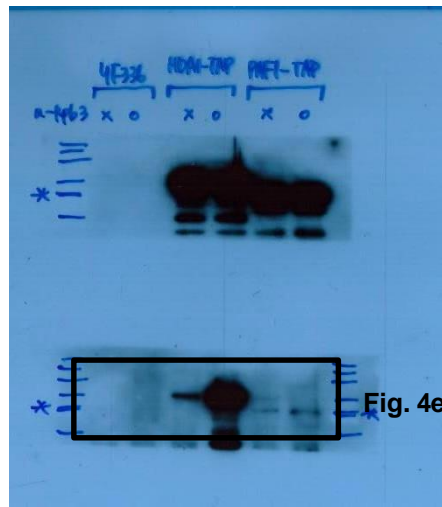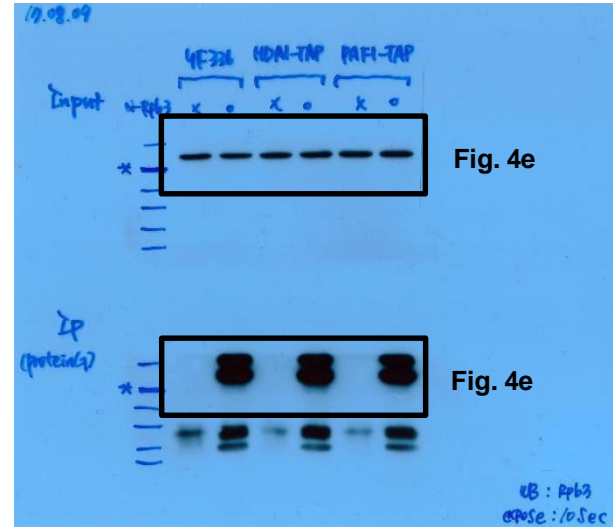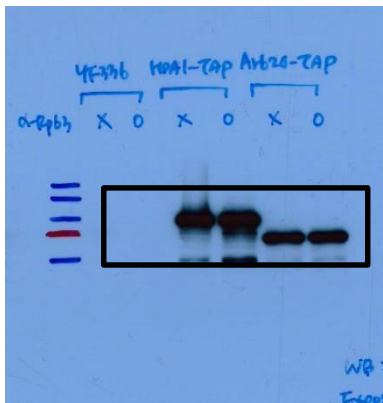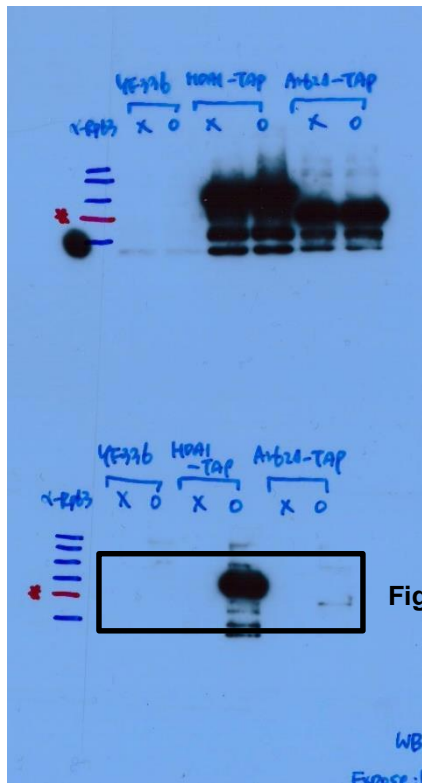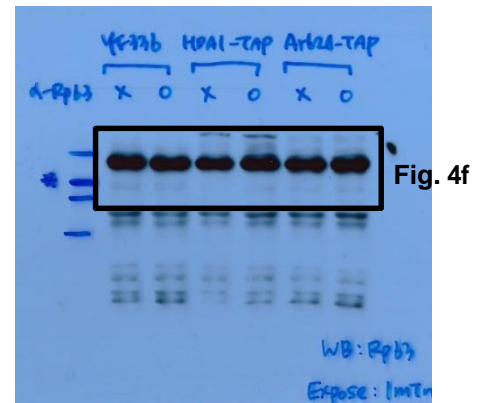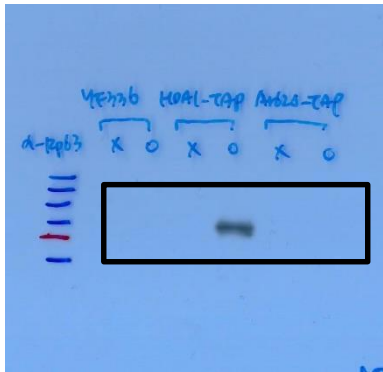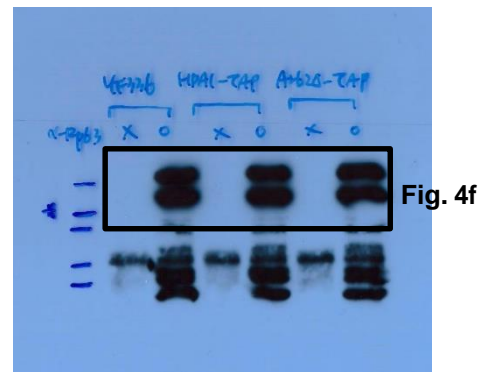

Supplementary Figure 8. Original western blots images for Fig. 4. The uncropped scans of western blot exposed to x-ray films.

Supplementary Figure 9

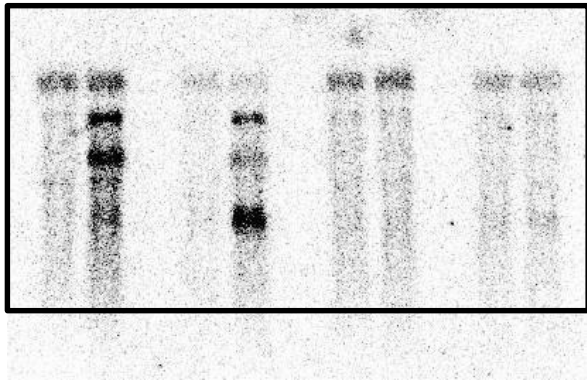

Supplementary Fig. 5h

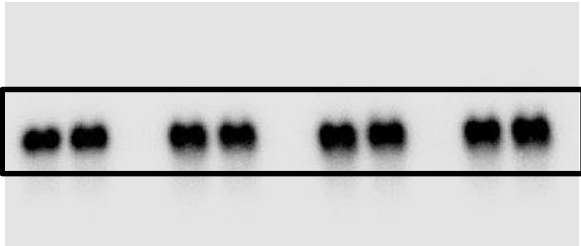

Supplementary Fig. 5h

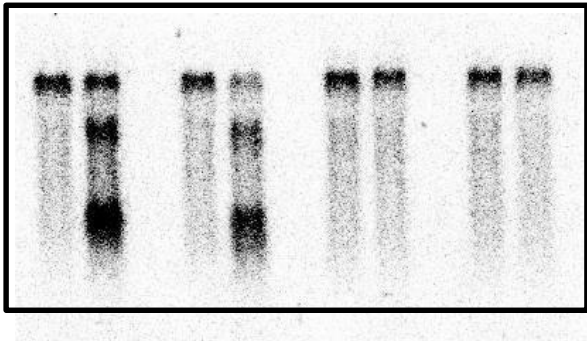

Supplementary Fig. 5i

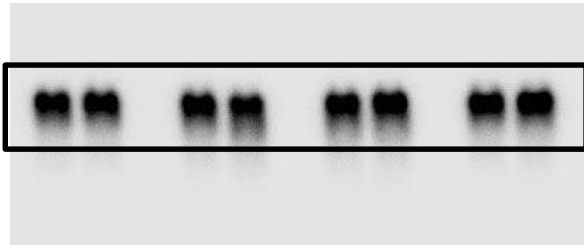

Supplementary Fig. 5i

**Supplementary Figure 9. Original northern blots images for Supplementary Figure 5. The uncropped scans of northern blot exposed to x-ray films.**

**Supplementary Table 1. Strains used in this study.**

| <b>Strains</b> | <b>Genotype</b>                                                                                                                                                                                                | <b>Source</b>                             |
|----------------|----------------------------------------------------------------------------------------------------------------------------------------------------------------------------------------------------------------|-------------------------------------------|
| BY4741(YF336)  | MATa, <i>ura3Δ0</i> , <i>leu2Δ0</i> , <i>his3Δ1</i> , <i>met15Δ0</i>                                                                                                                                           | Saccharomyces Genome Deletion Project     |
| YSB787         | MATa, <i>bur1Δ::HIS3</i> , <i>ura3-52</i> , <i>leu2Δ1</i> , <i>trp1Δ63</i> , <i>his3Δ200</i> , <i>lys2Δ202</i> ( <i>pRS316-BUR1</i> )                                                                          | S. Buratowski                             |
| YSB1002        | MATa, <i>bur1Δ::HIS3</i> , <i>ura3-52</i> , <i>leu2Δ1</i> or <i>leu2Δ0</i> , <i>trp1Δ63</i> , <i>his3Δ200</i> or <i>his3Δ1</i> , <i>lys2Δ202</i> , <i>met15Δ</i> , <i>set2Δ::KanMX4</i> ( <i>pRS316-BUR1</i> ) | S. Buratowski                             |
| YSB2286        | YF336- <i>set2Δ::NATMX</i>                                                                                                                                                                                     | S. Buratowski                             |
| YTK109         | YF336- <i>hda1Δ::KanMX4</i>                                                                                                                                                                                    | This study                                |
| YTK367         | YSB787- <i>hda2Δ::KanMX4</i>                                                                                                                                                                                   | This study                                |
| YTK111         | YF336- <i>hda3Δ::KanMX4</i>                                                                                                                                                                                    | This study                                |
| YTK113         | YSB787- <i>hda1Δ::KanMX4</i>                                                                                                                                                                                   | This study                                |
| YTK114         | YSB787- <i>hda1Δ::KanMX4</i>                                                                                                                                                                                   | This study                                |
| YTK115         | YSB787- <i>hda3Δ::KanMX4</i>                                                                                                                                                                                   | This study                                |
| YTK202         | YSB787- <i>tup1Δ::KanMX4</i>                                                                                                                                                                                   | This study                                |
| YTK203         | YSB787- <i>tup1Δ::KanMX4</i>                                                                                                                                                                                   | This study                                |
| YTK304         | YF336- <i>trp1Δ::URA3</i>                                                                                                                                                                                      | This study                                |
| YTK327         | YSB787- Hda1-18myc- <i>TRP1(K.lactis)</i>                                                                                                                                                                      | This study                                |
| YTK329         | YTK202- Hda1-18myc- <i>TRP1(K.lactis)</i>                                                                                                                                                                      | This study                                |
| YTK351         | YTK327- <i>hda2Δ::KanMX4</i>                                                                                                                                                                                   | This study                                |
| YTK353         | YTK327- <i>hda3Δ::KanMX4</i>                                                                                                                                                                                   | This study                                |
| YTK369         | YTK353- <i>hda2Δ::LEU2</i>                                                                                                                                                                                     | This study                                |
| YTK374         | YF336- <i>HDA1(ΔArb2 domain)</i>                                                                                                                                                                               | This study                                |
| YTK376         | YTK304-Hda1-18myc- <i>TRP1(K.lactis)</i>                                                                                                                                                                       | This study                                |
| YTK383         | YF336- <i>HDA1(ΔArb2 domain)</i> -18myc- <i>TRP1(K.lactis)</i>                                                                                                                                                 | This study                                |
| YTK416         | YTK376- <i>set1Δ::LEU2</i>                                                                                                                                                                                     | This study                                |
| YTK418         | YTK376- <i>set2Δ::KanMX4</i>                                                                                                                                                                                   | This study                                |
| YTK430         | YTK416- <i>set2Δ::KanMX4</i>                                                                                                                                                                                   | This study                                |
| YTK439         | YSB2286( <i>set2Δ::NATMX</i> )- <i>hda1Δ::KanMX4</i>                                                                                                                                                           | This study                                |
| YTK543         | YTK376- <i>ctk1Δ:: KanMX4</i>                                                                                                                                                                                  | This study                                |
| YF862          | MATa, <i>ura3Δ0</i> , <i>leu2Δ0</i> , <i>his3Δ1</i> , <i>met15Δ0</i> , <i>PAF1-TAP tag::HIS3</i>                                                                                                               | Nevan Krogan / Jack Greenblatt            |
| YF1394         | MATa, <i>ura3Δ0</i> , <i>leu2Δ0</i> , <i>his3Δ1</i> , <i>met15Δ0</i> , <i>HDA1-TAP tag::HIS3</i>                                                                                                               | Yeast TAP-Fusion library(Open Biosystems) |
| YTK688         | YTK374- <i>HDA1-TAP tag::HIS3</i>                                                                                                                                                                              | This study                                |
| YFP1           | Mat h- (972)                                                                                                                                                                                                   | Daeyoung Lee                              |

**Supplementary Table 2. Oligonucleotides used in this study**

| <b>Oligos</b>          | <b>Purpose</b> | <b>Sequence</b>                                                                                                |
|------------------------|----------------|----------------------------------------------------------------------------------------------------------------|
| HDA1(Up156)_F          | Knockout       | TAGGTAAATAGAGCTGGGAG                                                                                           |
| HDA1(Dn150)_R          | Knockout       | GTAAAACACAGCTTAATGCATT                                                                                         |
| HDA1_Up_Leu2_F         | Knockout       | ATATTGAGAAAGGGAAAGTTGAGCACTGTAATACGCCGAACAGATTA<br>AGC AACTGTGGGAATACTCAGGT                                    |
| HDA1_Dn_Leu2_R         | Knockout       | CATAAGGCATGAAGGTTGCCGAAAAAAATTATTAATGGCCAGTTTTT<br>CC TACCCTATGAACATATTCCA                                     |
| HDA3(up193)_F          | Knockout       | TACTGATTTAATCCACTCAGTT                                                                                         |
| HDA3(dn204)_R          | Knockout       | TGTATAGTAGTGATACGTGGT                                                                                          |
| TUP1_UpKanMX_F         | Knockout       | TTTTTTGATAAGCAGGGGAAGAAAGAAATCAGCTTCCATCCAAACCA<br>AT AGATTGTAAGTACTGAGAGTGCAC                                 |
| TUP1_DnKanMX_R         | Knockout       | GAATAGTTTGTAGTTAGTTACATTTGTAAAGTGTTCTTTTGTGTTCTGTT<br>C CTGTGCGGTATTTTACACCG                                   |
| TUP1(Up142)_F          | Knockout       | CCCCTCTATCTGTCCTTCTG                                                                                           |
| TUP1(Dn156)_R          | Knockout       | ATGGTGAGGAAAGTAACTGT                                                                                           |
| HDA1_PCORE_F(Arb2 del) | Knockout       | CCTCCTGATGAACTACCTGATCCATTAAGTGATCCCAAGCCTGAGGT<br>CAT GAGCTCGTTTTTCGACTGG                                     |
| HDA1_PCORE_R(Arb2 del) | Knockout       | GTTATCCATAAATATATTAGAAGTCTTGGGATGTAATCATTCTGAG<br>T TCCTTACCATTAAGTTGATC                                       |
| HDA1_Arb2_del_product  | Knockout       | ATGCGATTGCAAGAAGCGCTTTGAGTGTAGCAAAGTACTAATAGGG<br>GAG<br>TACATCAAGTATTTTCTTCTGTTGCCAAAATTGCTTTTATTGGAATAG<br>G |
| SET1(Up200)_F          | Knockout       | ACTTGCGATTCTAGCTCTTT                                                                                           |
| SET1(Dn200)_R          | Knockout       | CTTCAACAGTGAGAGATCGC                                                                                           |
| SET2(Up130)_F          | Knockout       | GGTGGTTATTTATCAGAACG                                                                                           |
| SET2(Dn200)_R          | Knockout       | GTGTCACATTACCTATCATT                                                                                           |
| Hda1_18myc_F           | myc tag        | ACAGACTTTATACTGGATTTCGTTTGAAGAATGGAGTGATGAAGAA<br>TCCGGTTCTGCTGCTAGTGGT                                        |
| Hda1_18myc_R           | myc tag        | GGCATGAAGGTTGCCGAAAAAAATTATTAATGGCCAGTTTTTCC<br>CCTCGAGGCCAGAAGACTAAG                                          |
| TRP1del_URA3_F         | Knockout       | ATGTCTGTTATTAATTTTACAGGTAGTTCTGGTCCATTGG<br>TTCAATTCATTCATCATT                                                 |
| TRP1del_URA3_R         | Knockout       | CTATTTCTTAGCATTGTTTACGAAATTTGCTATTTTGTTA<br>CGCAGGGTAATAACTGATAT                                               |
| HDA2_UpKanMX_F         | Knockout       | GGCTTCATTAGTGTGTGAAAAATAAAGAAAATAGATACAATACTATCG<br>AC AGATTGTAAGTACTGAGAGTGCAC                                |
| HDA2_DnKanMX_R         | Knockout       | ATAAAATCTCTCTATATTATACAGGCTACTTCTTTTAGGAAACGTCACA<br>T CTGTGCGGTATTTTACACCG                                    |
| HDA2_Up_Leu_F          | Knockout       | GGCTTCATTAGTGTGTGAAAAATAAAGAAAATAGATACAATACTATCG<br>AC AACTGTGGGAATACTCAGGT                                    |
| HDA2_Dn_Leu_R          | Knockout       | ATAAAATCTCTCTATATTATACAGGCTACTTCTTTTAGGAAACGTCACA<br>T TACCCTATGAACATATTCCA                                    |
| HDA2(Up189)_F          | Knockout       | TAAAATAACATAATTGCGGCAC                                                                                         |
| HDA2(Dn192)_R          | Knockout       | GTTGATGAAATGTTTCTGAAGA                                                                                         |
| CTK1(up200)_F          | Knockout       | GGTTCAGACAGTAAAATACATTT                                                                                        |
| CTK1(dn200)_R          | Knockout       | GTGTTGGTACGATGGACAAA                                                                                           |
| HXT5_promoter_F        | qRT-PCR        | AGATTCGCTTTCACTTTGCA                                                                                           |
| HXT5_promoter_R        | qRT-PCR        | GTAGCAGACCCTTCCAAGGG                                                                                           |
| HXT5_CDS_F             | qRT-PCR        | CAAACCTCTGTCCAATGGAGG                                                                                          |
| HXT5_CDS_R             | qRT-PCR        | TAGCTCTTGCTAAGGACCGC                                                                                           |
| SCR1_F                 | qRT-PCR        | GAAGTGTCCCGCTATAATAAA                                                                                          |

|                 |                |                             |
|-----------------|----------------|-----------------------------|
| SCR1_R          | qRT-PCR        | GACGCTGGATAAAACTCCCC        |
| TKL2_promoter_F | qRT-PCR        | AGTCGTATATTCAATTGGCT        |
| TKL2_promoter_R | qRT-PCR        | AATCTTAAAGTGGAAACCGC        |
| TKL2_CDS_F      | qRT-PCR        | GAAGACTGTTGTGGAACCCG        |
| TKL2_CDS_R      | qRT-PCR        | TTCGGTAAATGCTTTTCCCAAC      |
| GAL1_promoter_F | qRT-PCR        | ATGGAAAAGCTGCATAACCA        |
| GAL1_promoter_R | qRT-PCR        | AATCACTTCTTCTGAATGAG        |
| GAL1_CDS_F      | qRT-PCR        | CTACTCCGTTTAAATTTCCG        |
| GAL1_CDS_R      | qRT-PCR        | CAGCTAAAACATTTGCAGCT        |
| GAL1_3'end_F    | qRT-PCR        | TACTGTTCACTTGGTTCCAG        |
| GAL1_3'end_R    | qRT-PCR        | TCATATAGACAGCTGCCCAA        |
| GAL3_promoter_F | qRT-PCR        | TGCAACACATAGGCAGTAAA        |
| GAL3_promoter_R | qRT-PCR        | GTTGCCCTACCTTTTACTT         |
| GAL3_CDS_F      | qRT-PCR        | ATGAAATCAGTTTCGTCATC        |
| GAL3_CDS_R      | qRT-PCR        | ATTGTCCTTGTGAGATGGTA        |
| PMA1_promoter_F | qRT-PCR        | GGTACCGCTTATGCTCCCCTCCAT    |
| PMA1_promoter_R | qRT-PCR        | ATTTTTTTTCTTTCTTTTGAATGTGTG |
| PMA1_CDS_F      | qRT-PCR        | CAGAGTTGTTGAAATCTTGC        |
| PMA1_CDS_R      | qRT-PCR        | TGTCTGGAGGTCTTCAAAGC        |
| YEF3_promoter_F | qRT-PCR        | GCACGTGAAAAAGAAACGTTTTTAATG |
| YEF3_promoter_R | qRT-PCR        | GATGTTACCATTCAAGAAAGAAGCGAC |
| YEF3_CDS_F      | qRT-PCR        | GGTTTGAAGTTGAGAAAGTACAAGGG  |
| YEF3_CDS_R      | qRT-PCR        | TCAAAGTAGACTTACCAGCACC      |
| TEL-VI_F        | qRT-PCR        | GCGTAACAAAGCCATAATGCCTCC    |
| TEL-VI_R        | qRT-PCR        | CTCGTTAGGATCACGTTCGAATCC    |
| HAP1_(ORF)_F    | qRT-PCR        | AAAAAGGCAAACCCTAGCA         |
| HAP1_(ORF)_R    | qRT-PCR        | TCCTCCAAGTGTGTTTAAATC       |
| STT4_(ORF)_F    | qRT-PCR        | GCATAAATTTGAACCACGGT        |
| STT4_(ORF)_R    | qRT-PCR        | ATCTTAGTATCCTGGTTGCT        |
| STE11_F         | Northern probe | ATTCTGATGAGAATAATGAGC       |
| STE11_R         | Northern probe | AGAAATTCTTTCCTTCTGACG       |
| PCA1_F          | Northern probe | TGGAGTTCATATCAATGAGGGAA     |
| PCA1_R          | Northern probe | CATAACGCAGAAGTATAGCTACA     |
