# Supplementary material for: Transcription-dependent targeting of Hda1C to hyperactive genes mediates H4-specific deacetylation in yeast
Source: PubMed Central journal article supplement (PMC6753149; doi:10.1038/s41467-019-12077-w), 2019-09-19
Supplement: 41467_2019_12077_MOESM3_ESM.pdf [file 41467_2019_12077_MOESM3_ESM.pdf]

## Reporting Summary

Nature Research wishes to improve the reproducibility of the work that we publish. This form provides structure for consistency and transparency in reporting. For further information on Nature Research policies, see [Authors & Referees](#) and the [Editorial Policy Checklist](#).

### Statistical parameters

When statistical analyses are reported, confirm that the following items are present in the relevant location (e.g. figure legend, table legend, main text, or Methods section).

n/a Confirmed

- The exact sample size ( $n$ ) for each experimental group/condition, given as a discrete number and unit of measurement
- An indication of whether measurements were taken from distinct samples or whether the same sample was measured repeatedly
- The statistical test(s) used AND whether they are one- or two-sided  
*Only common tests should be described solely by name; describe more complex techniques in the Methods section.*
- A description of all covariates tested
- A description of any assumptions or corrections, such as tests of normality and adjustment for multiple comparisons
- A full description of the statistics including central tendency (e.g. means) or other basic estimates (e.g. regression coefficient) AND variation (e.g. standard deviation) or associated estimates of uncertainty (e.g. confidence intervals)
- For null hypothesis testing, the test statistic (e.g.  $F$ ,  $t$ ,  $r$ ) with confidence intervals, effect sizes, degrees of freedom and  $P$  value noted  
*Give  $P$  values as exact values whenever suitable.*
- For Bayesian analysis, information on the choice of priors and Markov chain Monte Carlo settings
- For hierarchical and complex designs, identification of the appropriate level for tests and full reporting of outcomes
- Estimates of effect sizes (e.g. Cohen's  $d$ , Pearson's  $r$ ), indicating how they were calculated
- Clearly defined error bars  
*State explicitly what error bars represent (e.g. SD, SE, CI)*

Our web collection on [statistics for biologists](#) may be useful.

### Software and code

Policy information about [availability of computer code](#)

Data collection

H3K36me3 ChIP-seq data (GSE61888) and Histone acetylation upon set2 deletion data (GSE28099) in the Gene Expression Omnibus (<https://www.ncbi.nlm.nih.gov/geo>). Rpb3 data (E-TABM-1033) in ArrayExpress (<https://www.ebi.ac.uk/arrayexpress>).

Data analysis

ballgown-2.4.2, BEDTools-2.26.0, Bowtie2-2.2.5, deepTools-2.3.5, DiffBind-2.2.3, FastQC-0.11.5, FASTX Toolkit-0.0.13, GOstats-2.40.0, Gviz-1.18.2, HISAT2-2.0.4, IGV-2.3.91, LIMMA-3.30.13, MACS-2.1.0, NOISeq-2.16.0, Picard-tools-2.6, QualiMap-2.2.0, R-3.4.1, Samtools-1.3.1, spp-1.10.1, StringTie-1.3.0, UCSCtoolkit were used to analyze data.

ChIP-sequencing

Experiment and library preparation

Except for Fig. 1a and 3f-3g, all strains were grown in 200ml of YPD (Yeast extract Peptone Dextrose; 1% Yeast Extract, 2% Peptone, 2% Dextrose (Glucose)) at 30°C until OD600 was 0.5-0.6. For Fig. 1a, the indicated strains were grown in YPD or YP-Galactose (1% Yeast Extract, 2% Peptone, 2% Galactose). For Fig. 3f-3g, cells were grown in YP-Galactose media to an optical density at 600nm of 0.6 and subsequently transferred to YPD. Cells were then subjected to 1% formaldehyde crosslinking. Chromatin immunoprecipitations were done using the following histone antibodies: anti-H3K36me3 (Abcam 9050), anti-acetyl H4 (Upstate 06-598), anti-acetyl H3 (Millipore 06-599), anti-myc (BioLegend 626802) and anti-H3 (Abcam 1791). Precipitated DNAs were analyzed in real-time using THUNDERBIRD® SYBR® qPCR Mix (TOYOBO) and CFX96 cyler (Bio-Rad). ChIP-seq libraries were prepared using Accel-NGS 2S Plus DNA Library Kit (Swift Biosciences). The prepared libraries were sequenced on an Illumina HiSeq2500 using 100 bp paired end platform.

Alignment and quantification

Bowtie2-2.2.5 32 aligned sequences to the *S. cerevisiae* genome (R61-1-1). Picard-tools-2.6 (<http://broadinstitute.github.io/picard>) removed duplicates with parameters `VALIDATION_STRINGENCY=silent AS=true`. Information inferred from alignment was converted into a form of visualization by command `genomeCoverageBed -bg -scale SCALE_FACTOR` in BEDTools-2.26.0 34. IGV-2.3.91 35 is used for visualization of genomic tracks.

#### Comparison of enrichment between samples

The majority of processes in this subsection were performed with deepTools-2.3.5 36. Command `bamCompare` compared information of two files. Then, command `computeMatrix` calculated scores per genome regions and yielded a scoring matrix. There are two modes in this step; `scale-regions` was used to stretch all regions to the same length, and `reference-point` was used to focus on genomic positions before and after of the reference point. Finally, command `plotProfile` can plot the profile of metagenes from the scoring matrix. On the other hand, command `plotHeatmap` can plot the profile of individual genes. R function `kmeans` could divide individual genes in the scoring matrix into subsets with k-means clustering. GOstats-2.40.0 37 identified Gene Ontologies (GOs) enriched in certain genes. R-3.4.1 (<http://www.r-project.org>) was used to plot a heatmap with p-values of the result. Function `plot` of R-3.4.1 make a scatterplot and `cor.test` computed Pearson's correlation coefficients and P-values.

#### Identification of significantly enriched regions

MACS-2.1.0 39 identified peaks with command `macs2 callpeak` with minimum FDR (q-value) cutoff of 0.01. DiffBind-2.2.3 40 computed correlation of read counts in detected peaks between samples and identified the reproducibility between replicates. Gviz-1.18.2 41 visualized the location of the peaks on chromosomes.

#### Comparison of enrichment between samples

If the public data is raw data, limma-3.30.13 42 was used to process it. On the other hand, if the public data is processed data, it was directly used. IGV-2.3.91 35 is used for visualization of genomic tracks. Comparison of samples repeated the steps of ChIP-seq data analysis with deepTools-2.3.5 (Ramirez et al., 2016). Signals at the same probes between two samples were directly compared. Due to the low resolution of ChIP-chip data, scores in a scoring matrix were smoothed with windows of the size of 500 bp differently from ChIP-seq data with windows of the size of 10 bp.

#### RNA-sequencing

Total RNA was prepared by hot-phenol method. mRNA-seq libraries were prepared using NEXTflex Rapid Directional mRNA-Seq Kit (Boo Scientific). The libraries were sequenced on an Illumina HiSeq2500 100 bp paired end platform (Macrogen Inc., South Korea). HISAT2-2.0.4 (Kim et al., 2015) aligned sequences to the transcriptome (ENSEMBL 86) of *S. cerevisiae* (R61-1-1) with a parameter `--rna-strandness RF`. Information inferred from alignment was converted into a form of visualization by command `genomeCoverageBed -bg -split -scale SCALE_FACTOR` in BEDTools-2.26.0 (Quinlan and Hall, 2010). Reads on known transcript were counted by StringTie-1.3.0 with parameters `-e -B 43`. Fragments per kilobase of transcript per million mapped reads (FPKM) was used as a normalized expression level. Genes expressed with more than 1.7-fold in any comparison were regarded as significantly up-regulated genes. R-3.4.1 (<http://www.r-project.org>) was used to plot a heatmap of these genes. Reads on regions surrounding TSSs of these genes were counted. R-3.4.1 was used to draw a violin plot of the reads. R function `permTS` in `perm` package examined the difference between the counts by permutation test.

For manuscripts utilizing custom algorithms or software that are central to the research but not yet described in published literature, software must be made available to editors/reviewers upon request. We strongly encourage code deposition in a community repository (e.g. GitHub). See the Nature Research [guidelines for submitting code & software](#) for further information.

## Data

Policy information about [availability of data](#)

All manuscripts must include a [data availability statement](#). This statement should provide the following information, where applicable:

- Accession codes, unique identifiers, or web links for publicly available datasets
- A list of figures that have associated raw data
- A description of any restrictions on data availability

The RNA-seq and ChIP-seq datasets were deposited at Gene Expression Omnibus under accession number GSE121763.

## Field-specific reporting

Please select the best fit for your research. If you are not sure, read the appropriate sections before making your selection.

Life sciences  Behavioural & social sciences  Ecological, evolutionary & environmental sciences

For a reference copy of the document with all sections, see [nature.com/authors/policies/ReportingSummary-flat.pdf](https://www.nature.com/authors/policies/ReportingSummary-flat.pdf)

## Life sciences study design

All studies must disclose on these points even when the disclosure is negative.

Sample size All the experiments were done with at least two independent samples. Standard deviations were calculated from two biological replicates, each with three technical replicates.

Data exclusions No data were excluded from the study.

Replication The findings in this study were highly reproducible and all data were from two independent biological replicates, each with three technical replicates.

Randomization

Blinding

## Reporting for specific materials, systems and methods

### Materials & experimental systems

n/a Involved in the study

Unique biological materials

Antibodies

Eukaryotic cell lines

Palaeontology

Animals and other organisms

Human research participants

### Methods

n/a Involved in the study

ChIP-seq

Flow cytometry

MRI-based neuroimaging

### Antibodies

Antibodies used

Validation

### Eukaryotic cell lines

Policy information about [cell lines](#)

Cell line source(s)

Authentication

Mycoplasma contamination

Commonly misidentified lines (See [ICLAC](#) register)

### ChIP-seq

Data deposition

Confirm that both raw and final processed data have been deposited in a public database such as [GEO](#).

Confirm that you have deposited or provided access to graph files (e.g. BED files) for the called peaks.

Data access links   
*May remain private before publication.*

Token: ghczkcumzlwznil

Files in database submission

YTK113-2-H3\_noDup.norm.bw  
YTK202-1-H3ac\_noDup.norm.bw  
YTK202-2-H3ac\_noDup.norm.bw  
YTK202-1-H4ac\_noDup.norm.bw  
YTK202-2-H4ac\_noDup.norm.bw  
YTK202-1-H3\_noDup.norm.bw  
YTK202-2-H3\_noDup.norm.bw  
YTK304-1-IP\_noDup.norm.bw  
YTK304-2-IP\_noDup.norm.bw  
YTK304-1-Input\_noDup.norm.bw  
YTK304-2-Input\_noDup.norm.bw  
YTK376-1-IP\_noDup.norm.bw  
YTK376-2-IP\_noDup.norm.bw  
YTK376-1-Input\_noDup.norm.bw  
YTK376-2-Input\_noDup.norm.bw  
YTK383-1-IP\_noDup.norm.bw  
YTK383-2-IP\_noDup.norm.bw  
YTK383-1-Input\_noDup.norm.bw  
YTK383-2-Input\_noDup.norm.bw  
YSB787-1-H3ac\_peaks.narrowPeak  
YSB787-2-H3ac\_peaks.narrowPeak  
YSB787-1-H4ac\_peaks.narrowPeak  
YSB787-2-H4ac\_peaks.narrowPeak  
YTK113-1-H3ac\_peaks.narrowPeak  
YTK113-2-H3ac\_peaks.narrowPeak  
YTK113-1-H4ac\_peaks.narrowPeak  
YTK113-2-H4ac\_peaks.narrowPeak  
YTK202-1-H3ac\_peaks.narrowPeak  
YTK202-2-H3ac\_peaks.narrowPeak  
YTK202-1-H4ac\_peaks.narrowPeak  
YTK202-2-H4ac\_peaks.narrowPeak  
YTK304-1-IP\_peaks.narrowPeak  
YTK304-2-IP\_peaks.narrowPeak  
YTK376-1-IP\_peaks.narrowPeak  
YTK376-2-IP\_peaks.narrowPeak  
YTK383-1-IP\_peaks.narrowPeak  
YTK383-2-IP\_peaks.narrowPeak  
YSB787-1-H3ac\_1.fastq.gz  
YSB787-1-H3ac\_2.fastq.gz  
YSB787-2-H3ac\_1.fastq.gz  
YSB787-2-H3ac\_2.fastq.gz  
YSB787-1-H4ac\_1.fastq.gz  
YSB787-1-H4ac\_2.fastq.gz  
YSB787-2-H4ac\_1.fastq.gz  
YSB787-2-H4ac\_2.fastq.gz  
YSB787-1-H3\_1.fastq.gz  
YSB787-1-H3\_2.fastq.gz  
YSB787-2-H3\_1.fastq.gz  
YSB787-2-H3\_2.fastq.gz  
YTK113-1-H3ac\_1.fastq.gz  
YTK113-1-H3ac\_2.fastq.gz  
YTK113-2-H3ac\_1.fastq.gz  
YTK113-2-H3ac\_2.fastq.gz  
YTK113-1-H4ac\_1.fastq.gz  
YTK113-1-H4ac\_2.fastq.gz  
YTK113-2-H4ac\_1.fastq.gz  
YTK113-2-H4ac\_2.fastq.gz  
YTK113-1-H3\_1.fastq.gz  
YTK113-1-H3\_2.fastq.gz  
YTK113-2-H3\_1.fastq.gz  
YTK113-2-H3\_2.fastq.gz  
YTK202-1-H3ac\_1.fastq.gz  
YTK202-1-H3ac\_2.fastq.gz  
YTK202-2-H3ac\_1.fastq.gz  
YTK202-2-H3ac\_2.fastq.gz  
YTK202-1-H4ac\_1.fastq.gz  
YTK202-1-H4ac\_2.fastq.gz  
YTK202-2-H4ac\_1.fastq.gz  
YTK202-2-H4ac\_2.fastq.gz  
YTK202-1-H3\_1.fastq.gz  
YTK202-1-H3\_2.fastq.gz  
YTK202-2-H3\_1.fastq.gz  
YTK202-2-H3\_2.fastq.gz  
YTK304-1-IP\_1.fastq.gz  
YTK304-1-IP\_2.fastq.gz

YTK304-2-IP\_1.fastq.gz  
 YTK304-2-IP\_2.fastq.gz  
 YTK304-1-Input\_1.fastq.gz  
 YTK304-1-Input\_2.fastq.gz  
 YTK304-2-Input\_1.fastq.gz  
 YTK304-2-Input\_2.fastq.gz  
 YTK376-1-IP\_1.fastq.gz  
 YTK376-1-IP\_2.fastq.gz  
 YTK376-2-IP\_1.fastq.gz  
 YTK376-2-IP\_2.fastq.gz  
 YTK376-1-Input\_1.fastq.gz  
 YTK376-1-Input\_2.fastq.gz  
 YTK376-2-Input\_1.fastq.gz  
 YTK376-2-Input\_2.fastq.gz  
 YTK383-1-IP\_1.fastq.gz  
 YTK383-1-IP\_2.fastq.gz  
 YTK383-2-IP\_1.fastq.gz  
 YTK383-2-IP\_2.fastq.gz  
 YTK383-1-Input\_1.fastq.gz  
 YTK383-1-Input\_2.fastq.gz  
 YTK383-2-Input\_1.fastq.gz  
 YTK383-2-Input\_2.fastq.gz

Genome browser session  
 (e.g. [UCSC](#))

Please refer to '\*\_noDup.norm.bw' at 'https://www.ncbi.nlm.nih.gov/geo/query/acc.cgi?acc=GSE121763'

## Methodology

Replicates

Duplicates per a condition

Sequencing depth

Paired-end with each pairs of 101 bp  
 Sample, Total reads, Uniquely aligned reads  
 YSB787-1-H3ac, 19,808,802, 15,162,570  
 YSB787-2-H3ac, 19,553,582, 15,338,579  
 YTK113-1-H3ac, 20,628,832, 15,847,808  
 YTK113-2-H3ac, 21,546,474, 16,561,565  
 YTK202-1-H3ac, 27,388,532, 20,319,558  
 YTK202-2-H3ac, 21,955,768, 13,324,274  
 YSB787-1-H4ac, 25,884,876, 22,813,064  
 YSB787-2-H4ac, 25,173,490, 22,157,991  
 YTK113-1-H4ac, 27,144,668, 23,975,125  
 YTK113-2-H4ac, 23,596,034, 20,917,033  
 YTK202-1-H4ac, 23,378,372, 20,876,467  
 YTK202-2-H4ac, 23,175,256, 20,455,748  
 YSB787-1-H3, 20,127,892, 18,411,394  
 YSB787-2-H3, 25,008,764, 23,097,206  
 YTK113-1-H3, 25,989,764, 23,707,424  
 YTK113-2-H3, 25,333,704, 23,230,352  
 YTK202-1-H3, 22,835,290, 21,090,234  
 YTK202-2-H3, 23,863,466, 22,012,651  
 YTK304-1-IP, 28,696,040, 21,590,151  
 YTK304-2-IP, 26,778,898, 22,181,918  
 YTK376-1-IP, 24,893,350, 21,434,043  
 YTK376-2-IP, 27,224,250, 23,584,863  
 YTK383-1-IP, 29,923,502, 21,998,687  
 YTK383-2-IP, 28,829,954, 20,503,539  
 YTK304-1-Input, 33,134,532, 29,252,642  
 YTK304-2-Input, 29,153,044, 25,448,525  
 YTK376-1-Input, 22,871,072, 19,790,876  
 YTK376-2-Input, 29,766,610, 23,981,522  
 YTK383-1-Input, 27,972,688, 26,137,234  
 YTK383-2-Input, 28,856,718, 25,319,097

Antibodies

Anti-Histone H3 (Abcam, ab1791), Anti-acetyl-Histone H3 (Millipore, Cat#06-599), Anti-acetyl-Histone H4 (Millipore, Cat#06-598), Purified anti-c-Myc (BioLegend, Cat#626802)

Peak calling parameters

macs2-2.1.0 with corresponding controls and a parameter -q 0.01

Data quality

At q-value 0.01, compared to corresponding H3  
 Sample, Number of peaks  
 YSB787-1-H3ac, 2,501  
 YSB787-1-H4ac, 2,897  
 YTK113-1-H3ac, 2,717  
 YTK113-1-H4ac, 2,753  
 YTK202-1-H3ac, 2,841

YTK202-1-H4ac, 3,183  
YSB787-2-H3ac, 2,571  
YSB787-2-H4ac, 2,928  
YTK113-2-H3ac, 2,777  
YTK113-2-H4ac, 2,792  
YTK202-2-H3ac, 2,788  
YTK202-2-H4ac, 3,197  
At q-value 0.01, compared to corresponding input  
Sample, Number of peaks  
YTK304-1-IP, 40  
YTK304-2-IP, 30  
YTK376-1-IP, 862  
YTK376-2-IP, 846  
YTK383-1-IP, 573  
YTK383-2-IP, 390

## Software

FastQC-0.11.5 checked the quality of raw sequences. If necessary, FASTX Toolkit-0.0.13 was used filtered out reads with low qualities and mates were properly paired. Bowtie2-2.2.5 aligned sequences to the *S. cerevisiae* genome (R61-1-1). QualiMap-2.2.0 checked the quality of the alignment. Picard-tools-2.6 removed duplicates with parameters VALIDATION\_STRINGENCY=silent AS=true. bigWig files were generated using command genomeCoverageBed -bg -scale SCALE\_FACTOR in BEDTools-2.26.0; Scores represent RPM. narrowPeak files were generated using macs2-2.1.0 with corresponding controls and a parameter -q 0.01.
